## Correction: Dual-targeting nanoparticles with excellent gene transfection efficiency for gene therapy of peritoneal metastasis of colorectal cancer

Ling Li<sup>1,\*</sup>, Rui Deng<sup>2,\*</sup>, Yi Su<sup>2</sup> and Cheng Yang<sup>1</sup>

<sup>1</sup>The Key Laboratory of Food Colloids and Biotechnology, Ministry of Education, School of Chemical and Material Engineering, Jiangnan University, Wuxi 214122, China

<sup>2</sup>Hematology Department and Hematopoietic Stem Cell Transplantation Center, Cheng Du Military General Hospital of PLA, Chengdu 610083, China

\*These authors contributed equally to this work

### Published:

**Copyright:** Li et al. This is an open-access article distributed under the terms of the Creative Commons Attribution License 3.0 (CC BY 3.0), which permits unrestricted use, distribution, and reproduction in any medium, provided the original author and source are credited.

**This article has been corrected:** Due to errors during image processing, some images were incorrectly displayed in Figure 8A. The corrected Figure 8A is shown below. The authors declare that these corrections do not change the results or conclusions of this paper.

Original article: Oncotarget. 2017; 8:89837–89847. <https://doi.org/10.18632/oncotarget.21159>

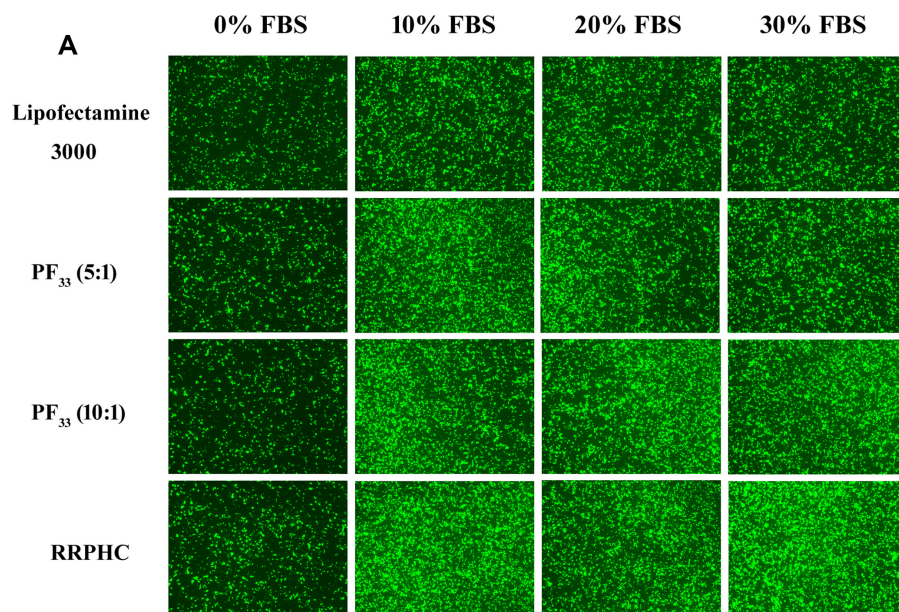

**Figure 8:** Comparison of the transfection efficiency of PF33/pGFP (PF33), RRPHC/pGFP (RRPHC) and Lipofectamine 3000/pGFP (Lipofectamine 3000) in medium containing 0%~30% serum in SW 480 cell. (A) Images taken by fluorescence microscope.
